# Supplementary material for: Bivalent COVID-19 mRNA booster vaccination (BA.1 or BA.4/BA.5) increases neutralization of matched Omicron variants
Source: PubMed Central journal article supplement (PMC10403593; doi:10.1038/s41541-023-00708-9), 2023-08-04
Supplement: 41541_2023_708_MOESM1_ESM.pdf [file 41541_2023_708_MOESM1_ESM.pdf]

1 **Supplementary Information:**

2 **Supplementary Table 1: Vaccination history of the monovalent vaccinated individuals**

| Study-ID<br>(Person) | Age<br>(years) | Sex | 1 <sup>st</sup><br>vacc. | 2 <sup>nd</sup><br>vacc. | 3 <sup>rd</sup><br>vacc. | 4 <sup>th</sup><br>vacc. | Days<br>2 <sup>nd</sup><br>vacc<br>to 3 <sup>rd</sup><br>vacc. | Days<br>3 <sup>rd</sup><br>vacc<br>to 4 <sup>th</sup><br>vacc. | Days 3 <sup>rd</sup><br>vacc. to<br>blood<br>sampling | Days 4 <sup>th</sup><br>vacc. to<br>blood<br>sampling |
|----------------------|----------------|-----|--------------------------|--------------------------|--------------------------|--------------------------|----------------------------------------------------------------|----------------------------------------------------------------|-------------------------------------------------------|-------------------------------------------------------|
| P3                   | 54.3           | f   | P                        | P                        | P                        | N                        | 285                                                            | N                                                              | 26                                                    | N                                                     |
| P4                   | 27.8           | f   | P                        | P                        | P                        | N                        | 288                                                            | N                                                              | 23                                                    | N                                                     |
| P5                   | 47.9           | f   | P                        | P                        | P                        | N                        | 287                                                            | N                                                              | 20                                                    | N                                                     |
| P9                   | 53.4           | f   | P                        | P                        | P                        | N                        | 287                                                            | N                                                              | 29                                                    | N                                                     |
| P13                  | 32.6           | f   | P                        | P                        | P                        | N                        | 290                                                            | N                                                              | 26                                                    | N                                                     |
| P14                  | 53.0           | m   | P                        | P                        | P                        | N                        | 273                                                            | N                                                              | 24                                                    | N                                                     |
| P15                  | 45.9           | f   | P                        | P                        | P                        | N                        | 287                                                            | N                                                              | 24                                                    | N                                                     |
| P36                  | 29.6           | f   | P                        | P                        | P                        | N                        | 244                                                            | N                                                              | 38                                                    | N                                                     |
| P17                  | 46.8           | f   | P                        | P                        | M                        | N                        | 224                                                            | N                                                              | 38                                                    | N                                                     |
| P19                  | 31.4           | f   | P                        | P                        | P                        | N                        | 301                                                            | N                                                              | 43                                                    | N                                                     |
| P22                  | 32.4           | f   | P                        | P                        | M                        | N                        | 224                                                            | N                                                              | 28                                                    | N                                                     |
| P23                  | 39.5           | f   | P                        | P                        | M                        | N                        | 211                                                            | N                                                              | 33                                                    | N                                                     |
| P24                  | 37.2           | f   | P                        | P                        | M                        | N                        | 224                                                            | N                                                              | 28                                                    | N                                                     |
| P25                  | 59.3           | f   | P                        | P                        | P                        | N                        | 245                                                            | N                                                              | 22                                                    | N                                                     |
| P26                  | 26.3           | f   | P                        | P                        | P                        | N                        | 268                                                            | N                                                              | 21                                                    | N                                                     |
| P37                  | 27.8           | m   | P                        | P                        | P                        | N                        | 192                                                            | N                                                              | 26                                                    | N                                                     |
| P35                  | 27.0           | m   | P                        | P                        | P                        | N                        | 278                                                            | N                                                              | 23                                                    | N                                                     |
| P1                   | 53             | f   | P                        | P                        | P                        | P                        | 246                                                            | 265                                                            | N                                                     | 20                                                    |
| P2                   | 42.2           | m   | P                        | P                        | P                        | P                        | 287                                                            | 245                                                            | N                                                     | 16                                                    |
| P42                  | 39.3           | f   | P                        | P                        | M                        | P                        | 238                                                            | 274                                                            | N                                                     | 20                                                    |
| P6                   | 50.1           | f   | P                        | P                        | M                        | P                        | 235                                                            | 287                                                            | 28                                                    | 20                                                    |
| P8                   | 59.4           | f   | P                        | P                        | P                        | P                        | 287                                                            | 240                                                            | 28                                                    | 25                                                    |
| P10                  | 37.6           | f   | P                        | P                        | P                        | P                        | 286                                                            | 265                                                            | 21                                                    | 23                                                    |
| P11                  | 51.9           | f   | P                        | P                        | M                        | P                        | 212                                                            | 152                                                            | 32                                                    | 31                                                    |
| P12                  | 57             | f   | P                        | P                        | P                        | M                        | 163                                                            | 175                                                            | 40                                                    | 29                                                    |
| P16                  | 29.2           | f   | P                        | P                        | P                        | P                        | 287                                                            | 224                                                            | 15                                                    | 21                                                    |
| P18                  | 52.7           | f   | P                        | P                        | M                        | P                        | 238                                                            | 300                                                            | 22                                                    | 30                                                    |
| P21                  | 45.8           | m   | P                        | P                        | P                        | P                        | 288                                                            | 229                                                            | 16                                                    | 21                                                    |
| P27                  | 64.8           | f   | P                        | P                        | P                        | P                        | 287                                                            | 156                                                            | 30                                                    | 22                                                    |
| P28                  | 82.7           | f   | P                        | P                        | P                        | P                        | 205                                                            | 147                                                            | N                                                     | 38                                                    |
| P43                  | 80.1           | m   | M                        | M                        | M                        | M                        | NA                                                             | 211                                                            | N                                                     | 26                                                    |
| P29                  | 56.3           | m   | P                        | P                        | P                        | P                        | 245                                                            | 262                                                            | N                                                     | 24                                                    |
| P38                  | 40.8           | f   | P                        | P                        | P                        | P                        | NA                                                             | 231                                                            | N                                                     | 21                                                    |
| P39                  | 38.8           | m   | P                        | P                        | P                        | P                        | 75                                                             | 267                                                            | N                                                     | 24                                                    |
| P30                  | 54.6           | f   | P                        | P                        | P                        | M                        | 251                                                            | 251                                                            | 30                                                    | 30                                                    |
| P44                  | 59.6           | m   | P                        | P                        | P                        | P                        | 185                                                            | 221                                                            | N                                                     | 24                                                    |
| P45                  | 59.2           | f   | P                        | P                        | P                        | P                        | 128                                                            | 228                                                            | N                                                     | 22                                                    |
| P46                  | 65.5           | m   | P                        | P                        | P                        | P                        | 185                                                            | 262                                                            | N                                                     | 22                                                    |
| P31                  | 56.1           | f   | P                        | P                        | P                        | M                        | 252                                                            | 263                                                            | 32                                                    | 24                                                    |
| P32                  | 53.5           | f   | P                        | P                        | P                        | P                        | 226                                                            | 292                                                            | 32                                                    | 25                                                    |
| P33                  | 62.4           | m   | P                        | P                        | P                        | P                        | 283                                                            | 241                                                            | 21                                                    | 21                                                    |
| P34                  | 63.2           | f   | P                        | P                        | P                        | P                        | 260                                                            | 270                                                            | 27                                                    | 29                                                    |
| P41                  | 58.3           | f   | P                        | P                        | P                        | P                        | 180                                                            | 274                                                            | N                                                     | 18                                                    |

3

4 Age: in years at time of blood sampling; m: male. f: female; vacc.: vaccination; P: Biontech/Pfizer “Comirnaty”  
5 BNT162b2; M: Moderna “Spikevax” mRNA-1273; NA: not available, N: No

6

7

8

9

10 **Supplementary Table 2: Vaccination history of the bivalent vaccinated individuals**

| <b>Study-ID<br/>(Person)</b> | <b>Age<br/>(years)</b> | <b>Sex</b> | <b>1<sup>st</sup><br/>vacc.</b> | <b>2<sup>nd</sup><br/>vacc.</b> | <b>3<sup>rd</sup><br/>vacc.</b> | <b>4<sup>th</sup> vacc.</b> | <b>Days<br/>2<sup>nd</sup><br/>vacc<br/>to 3<sup>rd</sup><br/>vacc.</b> | <b>Days<br/>3<sup>rd</sup><br/>vacc.<br/>to 4<sup>th</sup><br/>vacc.</b> | <b>Days 4<sup>th</sup><br/>vacc. to<br/>blood<br/>sampling</b> |
|------------------------------|------------------------|------------|---------------------------------|---------------------------------|---------------------------------|-----------------------------|-------------------------------------------------------------------------|--------------------------------------------------------------------------|----------------------------------------------------------------|
| P89                          | 39.4                   | m          | AZ                              | AZ                              | P                               | P-BA.1                      | 177                                                                     | 306                                                                      | 27                                                             |
| P90                          | 52.8                   | f          | P                               | P                               | P                               | P-BA.1                      | 142                                                                     | 306                                                                      | 21                                                             |
| P91                          | 54.3                   | f          | P                               | P                               | P                               | P-BA.1                      | 160                                                                     | 308                                                                      | 28                                                             |
| P92                          | 38.1                   | m          | P                               | P                               | P                               | P-BA.1                      | 146                                                                     | 291                                                                      | 21                                                             |
| P93                          | 62.2                   | m          | P                               | P                               | P                               | P-BA.1                      | 162                                                                     | 291                                                                      | 21                                                             |
| P94                          | 52.7                   | m          | P                               | P                               | P                               | P-BA.1                      | NA                                                                      | NA                                                                       | 21                                                             |
| P95                          | 51.4                   | f          | AZ                              | AZ                              | P                               | P-BA.1                      | 138                                                                     | 302                                                                      | 31                                                             |
| P96                          | 44.73                  | w          | J                               | P                               | P                               | P-BA.1                      | 148                                                                     | 203                                                                      | 21                                                             |
| P97                          | 40.10                  | m          | P                               | P                               | P                               | P-BA.1                      | 148                                                                     | 279                                                                      | 22                                                             |
| P98                          | 58.92                  | m          | P                               | P                               | P                               | P-BA.1                      | 167                                                                     | 308                                                                      | 21                                                             |
| P99                          | 54.54                  | m          | P                               | P                               | P                               | P-BA.1                      | 277                                                                     | 238                                                                      | 21                                                             |
| P100                         | 46.43                  | w          | P                               | P                               | P                               | P-BA.1                      | 138                                                                     | 296                                                                      | 20                                                             |
| P101                         | 39.1                   | f          | P                               | P                               | P                               | P-BA.5                      | 147                                                                     | 331                                                                      | 21                                                             |
| P102                         | 46.4                   | m          | P                               | P                               | P                               | P-BA.5                      | 157                                                                     | 309                                                                      | 21                                                             |
| P103                         | 38.6                   | m          | J                               | P                               | P                               | P-BA.5                      | 125                                                                     | 231                                                                      | 21                                                             |
| P104                         | 34.4                   | m          | P                               | P                               | P                               | P-BA.5                      | 107                                                                     | 243                                                                      | 21                                                             |
| P105                         | 56.0                   | f          | J                               | P                               | P                               | P-BA.5                      | 122                                                                     | 232                                                                      | 21                                                             |
| P106                         | 58.4                   | f          | P                               | P                               | P                               | P-BA.5                      | 187                                                                     | 302                                                                      | 21                                                             |
| P107                         | 52.6                   | f          | AZ                              | AZ                              | P                               | P-BA.5                      | 138                                                                     | 308                                                                      | 21                                                             |
| P108                         | 62.5                   | m          | P                               | P                               | P                               | P-BA.5                      | 183                                                                     | 298                                                                      | 21                                                             |
| P109                         | 52.1                   | f          | P                               | P                               | P                               | P-BA.5                      | 188                                                                     | 306                                                                      | 21                                                             |
| P110                         | 41.9                   | m          | J                               | P                               | P                               | P-BA.5                      | 125                                                                     | 232                                                                      | 21                                                             |
| P111                         | 38.8                   | f          | P                               | P                               | P                               | P-BA.5                      | 134                                                                     | 301                                                                      | 21                                                             |
| P112                         | 32.8                   | f          | P                               | P                               | P                               | P-BA.5                      | 132                                                                     | 318                                                                      | 21                                                             |
| P113                         | 55.9                   | f          | P                               | P                               | P                               | P-BA.5                      | 140                                                                     | 298                                                                      | 21                                                             |
| P114                         | 45.0                   | f          | P                               | P                               | P                               | P-BA.5                      | 173                                                                     | 287                                                                      | 21                                                             |
| P115                         | 57.3                   | f          | P                               | P                               | P                               | P-BA.5                      | 158                                                                     | 304                                                                      | 21                                                             |
| P116                         | 50.1                   | f          | P                               | P                               | P                               | P-BA.5                      | 163                                                                     | 307                                                                      | 21                                                             |
| P117                         | 56.2                   | f          | P                               | P                               | P                               | P-BA.5                      | 148                                                                     | 298                                                                      | 21                                                             |
| P118                         | 50.7                   | f          | AZ                              | AZ                              | P                               | P-BA.5                      | 153                                                                     | 306                                                                      | 21                                                             |
| P119                         | 55.7                   | m          | J                               | P                               | P                               | P-BA.5                      | 105                                                                     | 243                                                                      | 21                                                             |
| P120                         | 57.0                   | m          | P                               | P                               | P                               | P-BA.5                      | 179                                                                     | 322                                                                      | 30                                                             |
| BT55                         | 27.8                   | m          | P                               | P                               | P                               | P-BA.5                      | 278                                                                     | 329                                                                      | 28                                                             |
| P121                         | 26.6                   | f          | P                               | P                               | P                               | P-BA.5                      | NA                                                                      | 330                                                                      | 28                                                             |

11 Age: in years at time of blood sampling; m: male, f: female; vacc.: vaccination; AZ: Astra-Zeneca “Vaxzevria”  
 12 ChAdOx1; P: Monovalent Biontech/Pfizer “Comirnaty” BNT162b2; J: Johnson & Johnson Ad26.COV2.S; P-BA.1:  
 13 Biontech/Pfizer Bivalent (WT/BA.1) BNT162b2 BA.1; P-BA.5: Biontech/Pfizer Bivalent (WT/BA.5) BNT162b2  
 14 BA.5; M: Moderna “Spikevax” mRNA-1273; NA: not available

15 **Supplementary Table 3: Vaccination history of the subjects who experienced Omicron**  
 16 **breakthrough infection**

| <b>Study-ID<br/>(Person)</b> | <b>Age<br/>(years)</b> | <b>Sex</b> | <b>1<sup>st</sup><br/>vacc.</b> | <b>2<sup>nd</sup><br/>vacc.</b> | <b>3<sup>rd</sup><br/>vacc.</b> | <b>4<sup>th</sup><br/>vacc.</b> | <b>Days 2<sup>nd</sup><br/>vacc to<br/>3<sup>rd</sup> vacc.</b> | <b>Days 3<sup>rd</sup><br/>vacc. to<br/>4<sup>th</sup> vacc.</b> | <b>Infecting<br/>Omicron<br/>variant</b> | <b>Days<br/>last<br/>vacc.<br/>to<br/>infecti<br/>on</b> | <b>Days<br/>infecti<br/>on to<br/>blood<br/>sampli<br/>ng</b> |
|------------------------------|------------------------|------------|---------------------------------|---------------------------------|---------------------------------|---------------------------------|-----------------------------------------------------------------|------------------------------------------------------------------|------------------------------------------|----------------------------------------------------------|---------------------------------------------------------------|
| P09                          | 53.6                   | f          | P                               | P                               | P                               | N                               | 287                                                             | N                                                                | BA.1                                     | 101                                                      | 20                                                            |
| P17                          | 47.1                   | f          | P                               | P                               | M                               | N                               | 224                                                             | N                                                                | BA.1                                     | 143                                                      | 19                                                            |
| P22                          | 32.8                   | f          | P                               | P                               | M                               | N                               | 224                                                             | N                                                                | BA.1                                     | 139                                                      | 18                                                            |
| P23                          | 39.9                   | f          | P                               | P                               | M                               | N                               | 211                                                             | N                                                                | BA.1                                     | 142                                                      | 18                                                            |
| P52                          | 26.8                   | m          | M                               | M                               | M                               | N                               | 185                                                             | N                                                                | BA.1                                     | 28                                                       | 20                                                            |
| P53                          | 22.5                   | m          | P                               | P                               | P                               | N                               | 178                                                             | N                                                                | BA.1                                     | 35                                                       | 20                                                            |
| P54                          | 25.2                   | f          | P                               | P                               | N                               | N                               | N                                                               | N                                                                | BA.1                                     | 202                                                      | 17                                                            |
| P55                          | 43.1                   | m          | P                               | P                               | N                               | N                               | N                                                               | N                                                                | BA.1                                     | 123                                                      | 13                                                            |
| P56                          | 76.6                   | f          | P                               | P                               | P                               | N                               | 195                                                             | N                                                                | BA.1                                     | 110                                                      | 30                                                            |
| P57                          | 33.7                   | f          | P                               | P                               | P                               | N                               | 145                                                             | N                                                                | BA.1                                     | 105                                                      | 36                                                            |
| P59                          | 55.4                   | m          | P                               | P                               | P                               | N                               | 165                                                             | N                                                                | BA.1                                     | 99                                                       | 24                                                            |
| P04                          | 28.1                   | f          | P                               | P                               | P                               | N                               | 288                                                             | N                                                                | BA.2                                     | 110                                                      | 22                                                            |
| P28                          | 82.8                   | f          | P                               | P                               | P                               | P                               | 205                                                             | 147                                                              | BA.2                                     | 80                                                       | 16                                                            |
| P37                          | 28.0                   | m          | P                               | P                               | P                               | N                               | 192                                                             | N                                                                | BA.2                                     | 59                                                       | 28                                                            |
| P48                          | 39.2                   | f          | P                               | P                               | M                               | N                               | 238                                                             | N                                                                | BA.2                                     | 245                                                      | 56                                                            |
| P49                          | 57.2                   | f          | P                               | P                               | M                               | N                               | 224                                                             | N                                                                | BA.2                                     | 190                                                      | 27                                                            |
| P51                          | 59.6                   | f          | P                               | P                               | P                               | N                               | 244                                                             | N                                                                | BA.2                                     | 179                                                      | 35                                                            |
| P58                          | 51.9                   | f          | P                               | P                               | P                               | N                               | 143                                                             | N                                                                | BA.2                                     | 114                                                      | 27                                                            |
| P03                          | 54.9                   | f          | P                               | P                               | P                               | N                               | 285                                                             | N                                                                | BA.4/5                                   | 218                                                      | 24                                                            |
| P14                          | 53.6                   | m          | P                               | P                               | P                               | N                               | 273                                                             | N                                                                | BA.4/5                                   | 216                                                      | 28                                                            |
| P19                          | 31.9                   | f          | P                               | P                               | P                               | N                               | 301                                                             | N                                                                | BA.4/5                                   | 199                                                      | 24                                                            |
| P24                          | 38.0                   | f          | P                               | P                               | M                               | N                               | 224                                                             | N                                                                | BA.4/5                                   | 321                                                      | 30                                                            |
| P25                          | 60.1                   | f          | P                               | P                               | P                               | P                               | 245                                                             | 282                                                              | BA.4/5                                   | 13                                                       | 22                                                            |
| P27                          | 64.9                   | f          | P                               | P                               | P                               | P                               | 287                                                             | 156                                                              | BA.4/5                                   | 40                                                       | 36                                                            |
| P29                          | 56.4                   | m          | P                               | P                               | P                               | P                               | 245                                                             | 262                                                              | BA.4/5                                   | 50                                                       | 23                                                            |
| P44                          | 59.7                   | m          | P                               | P                               | P                               | P                               | 185                                                             | 221                                                              | BA.4/5                                   | 38                                                       | 24                                                            |
| P47                          | 47.5                   | f          | P                               | P                               | M                               | N                               | 218                                                             | N                                                                | BA.4/5                                   | 285                                                      | 52                                                            |
| P50                          | 56.6                   | f          | P                               | P                               | P                               | N                               | 288                                                             | N                                                                | BA.4/5                                   | 212                                                      | 22                                                            |

17  
 18 *Age: in years at time of blood sampling; m: male, f: female; vacc.: vaccination; AZ: Astra-Zeneca “Vaxzevria”*  
 19 *ChAdOx1; P: Monovalent Biontech/Pfizer “Comirnaty” BNT162b2; P-BA.1: Biontech/Pfizer Bivalent (WT/BA.1)*  
 20 *BNT162b2 BA.1; P-BA.5: Biontech/Pfizer Bivalent (WT/BA.5) BNT162b2 BA.5, M: Moderna “Spikevax” mRNA-*  
 21 *1273; NA: not available, N: No*
