# Supplementary material for: Bivalent COVID-19 mRNA booster vaccination (BA.1 or BA.4/BA.5) increases neutralization of matched Omicron variants
Source: PubMed Central journal article supplement (PMC10403593; doi:10.1038/s41541-023-00708-9), 2023-08-04
Supplement: 41541_2023_708_MOESM2_ESM.pdf [file 41541_2023_708_MOESM2_ESM.pdf]

## Reporting Summary

Nature Portfolio wishes to improve the reproducibility of the work that we publish. This form provides structure for consistency and transparency in reporting. For further information on Nature Portfolio policies, see our [Editorial Policies](#) and the [Editorial Policy Checklist](#).

### Statistics

For all statistical analyses, confirm that the following items are present in the figure legend, table legend, main text, or Methods section.

- | n/a                                 | Confirmed                                                                                                                                                                                                                                                                                      |
|-------------------------------------|------------------------------------------------------------------------------------------------------------------------------------------------------------------------------------------------------------------------------------------------------------------------------------------------|
| <input type="checkbox"/>            | <input checked="" type="checkbox"/> The exact sample size ( $n$ ) for each experimental group/condition, given as a discrete number and unit of measurement                                                                                                                                    |
| <input type="checkbox"/>            | <input checked="" type="checkbox"/> A statement on whether measurements were taken from distinct samples or whether the same sample was measured repeatedly                                                                                                                                    |
| <input type="checkbox"/>            | <input checked="" type="checkbox"/> The statistical test(s) used AND whether they are one- or two-sided<br><i>Only common tests should be described solely by name; describe more complex techniques in the Methods section.</i>                                                               |
| <input type="checkbox"/>            | <input checked="" type="checkbox"/> A description of all covariates tested                                                                                                                                                                                                                     |
| <input type="checkbox"/>            | <input checked="" type="checkbox"/> A description of any assumptions or corrections, such as tests of normality and adjustment for multiple comparisons                                                                                                                                        |
| <input type="checkbox"/>            | <input checked="" type="checkbox"/> A full description of the statistical parameters including central tendency (e.g. means) or other basic estimates (e.g. regression coefficient) AND variation (e.g. standard deviation) or associated estimates of uncertainty (e.g. confidence intervals) |
| <input type="checkbox"/>            | <input checked="" type="checkbox"/> For null hypothesis testing, the test statistic (e.g. $F$ , $t$ , $r$ ) with confidence intervals, effect sizes, degrees of freedom and $P$ value noted<br><i>Give <math>P</math> values as exact values whenever suitable.</i>                            |
| <input checked="" type="checkbox"/> | <input type="checkbox"/> For Bayesian analysis, information on the choice of priors and Markov chain Monte Carlo settings                                                                                                                                                                      |
| <input checked="" type="checkbox"/> | <input type="checkbox"/> For hierarchical and complex designs, identification of the appropriate level for tests and full reporting of outcomes                                                                                                                                                |
| <input checked="" type="checkbox"/> | <input type="checkbox"/> Estimates of effect sizes (e.g. Cohen's $d$ , Pearson's $r$ ), indicating how they were calculated                                                                                                                                                                    |

*Our web collection on [statistics for biologists](#) contains articles on many of the points above.*

### Software and code

Policy information about [availability of computer code](#)

Data collection

Data analysis

For manuscripts utilizing custom algorithms or software that are central to the research but not yet described in published literature, software must be made available to editors and reviewers. We strongly encourage code deposition in a community repository (e.g. GitHub). See the Nature Portfolio [guidelines for submitting code & software](#) for further information.

### Data

Policy information about [availability of data](#)

All manuscripts must include a [data availability statement](#). This statement should provide the following information, where applicable:

- Accession codes, unique identifiers, or web links for publicly available datasets
- A description of any restrictions on data availability
- For clinical datasets or third party data, please ensure that the statement adheres to our [policy](#)

## Human research participants

Policy information about [studies involving human research participants and Sex and Gender in Research](#).

|                             |                                                                                                                                                                                                                                                                                                                 |
|-----------------------------|-----------------------------------------------------------------------------------------------------------------------------------------------------------------------------------------------------------------------------------------------------------------------------------------------------------------|
| Reporting on sex and gender | Sex was recorded as male/female on the patient return slip. Information about gender was not available.                                                                                                                                                                                                         |
| Population characteristics  | As described in the Supplementary Tables 1-3                                                                                                                                                                                                                                                                    |
| Recruitment                 | Re-analysis of diagnostic samples collected by large occupational health centers.                                                                                                                                                                                                                               |
| Ethics oversight            | All work was conducted in accordance with the Declaration of Helsinki in terms of informed consent and approval by an appropriate institutional board. The ethics committee of the Medical University of Vienna, Austria, approved the study protocol (EK 1035/2016, EK 1513/2016, EK 1926/2020, EK 1291/2021). |

Note that full information on the approval of the study protocol must also be provided in the manuscript.

## Field-specific reporting

Please select the one below that is the best fit for your research. If you are not sure, read the appropriate sections before making your selection.

Life sciences       Behavioural & social sciences       Ecological, evolutionary & environmental sciences

For a reference copy of the document with all sections, see [nature.com/documents/nr-reporting-summary-flat.pdf](https://www.nature.com/documents/nr-reporting-summary-flat.pdf)

## Life sciences study design

All studies must disclose on these points even when the disclosure is negative.

|                 |                                                                                                 |
|-----------------|-------------------------------------------------------------------------------------------------|
| Sample size     | No sample size calculation was performed. Sample sizes were chosen based on available subjects. |
| Data exclusions | none                                                                                            |
| Replication     | NT titer were calculated from replicates                                                        |
| Randomization   | none                                                                                            |
| Blinding        | none                                                                                            |

## Behavioural & social sciences study design

All studies must disclose on these points even when the disclosure is negative.

|                   |                |
|-------------------|----------------|
| Study description | not applicable |
| Research sample   | not applicable |
| Sampling strategy | not applicable |
| Data collection   | not applicable |
| Timing            | not applicable |
| Data exclusions   | not applicable |
| Non-participation | not applicable |
| Randomization     | not applicable |

# Ecological, evolutionary & environmental sciences study design

All studies must disclose on these points even when the disclosure is negative.

|                          |                                             |
|--------------------------|---------------------------------------------|
| Study description        | <input type="text" value="not applicable"/> |
| Research sample          | <input type="text" value="not applicable"/> |
| Sampling strategy        | <input type="text" value="not applicable"/> |
| Data collection          | <input type="text" value="not applicable"/> |
| Timing and spatial scale | <input type="text" value="not applicable"/> |
| Data exclusions          | <input type="text" value="not applicable"/> |
| Reproducibility          | <input type="text" value="not applicable"/> |
| Randomization            | <input type="text" value="not applicable"/> |
| Blinding                 | <input type="text" value="not applicable"/> |

Did the study involve field work?  Yes  No

## Reporting for specific materials, systems and methods

We require information from authors about some types of materials, experimental systems and methods used in many studies. Here, indicate whether each material, system or method listed is relevant to your study. If you are not sure if a list item applies to your research, read the appropriate section before selecting a response.

### Materials & experimental systems

| n/a                                 | Involved in the study                                     |
|-------------------------------------|-----------------------------------------------------------|
| <input checked="" type="checkbox"/> | <input type="checkbox"/> Antibodies                       |
| <input type="checkbox"/>            | <input checked="" type="checkbox"/> Eukaryotic cell lines |
| <input checked="" type="checkbox"/> | <input type="checkbox"/> Palaeontology and archaeology    |
| <input checked="" type="checkbox"/> | <input type="checkbox"/> Animals and other organisms      |
| <input checked="" type="checkbox"/> | <input type="checkbox"/> Clinical data                    |
| <input checked="" type="checkbox"/> | <input type="checkbox"/> Dual use research of concern     |

### Methods

| n/a                                 | Involved in the study                           |
|-------------------------------------|-------------------------------------------------|
| <input checked="" type="checkbox"/> | <input type="checkbox"/> ChIP-seq               |
| <input checked="" type="checkbox"/> | <input type="checkbox"/> Flow cytometry         |
| <input checked="" type="checkbox"/> | <input type="checkbox"/> MRI-based neuroimaging |

## Antibodies

|                 |                                             |
|-----------------|---------------------------------------------|
| Antibodies used | <input type="text" value="not applicable"/> |
| Validation      | <input type="text" value="not applicable"/> |

## Eukaryotic cell lines

Policy information about [cell lines and Sex and Gender in Research](#)

|                                                                      |                                                                                                                                                                                     |
|----------------------------------------------------------------------|-------------------------------------------------------------------------------------------------------------------------------------------------------------------------------------|
| Cell line source(s)                                                  | VeroE6: European Collection of Authenticated Cells (ECAC).<br>VeroE6-TMPRSS2: Anna Ohradanova Repic (Gawish et al. 2022<br>Elife. 2022 Jan 13;11:e74623. doi: 10.7554/eLife.74623.) |
| Authentication                                                       | European Collection of Authenticated<br>Cell Cultures (VeroE6: ECACC 85020206)                                                                                                      |
| Mycoplasma contamination                                             | Mycoplasma contamination was excluded by regular testing using the MycoAlert™ Mycoplasma Detection Kit (Lonza Group Ltd, Basel, Switzerland).                                       |
| Commonly misidentified lines<br>(See <a href="#">ICLAC</a> register) | not applicable                                                                                                                                                                      |

## Palaeontology and Archaeology

|                                                                                                                                                 |                                             |
|-------------------------------------------------------------------------------------------------------------------------------------------------|---------------------------------------------|
| Specimen provenance                                                                                                                             | <input type="text" value="not applicable"/> |
| Specimen deposition                                                                                                                             | <input type="text" value="not applicable"/> |
| Dating methods                                                                                                                                  | <input type="text" value="not applicable"/> |
| <input type="checkbox"/> Tick this box to confirm that the raw and calibrated dates are available in the paper or in Supplementary Information. |                                             |
| Ethics oversight                                                                                                                                | <input type="text" value="not applicable"/> |

Note that full information on the approval of the study protocol must also be provided in the manuscript.

## Animals and other research organisms

Policy information about [studies involving animals; ARRIVE guidelines](#) recommended for reporting animal research, and [Sex and Gender in Research](#)

|                         |                                   |
|-------------------------|-----------------------------------|
| Laboratory animals      | <input type="text" value="none"/> |
| Wild animals            | <input type="text" value="none"/> |
| Reporting on sex        | <input type="text" value="none"/> |
| Field-collected samples | <input type="text" value="none"/> |
| Ethics oversight        | <input type="text" value="none"/> |

Note that full information on the approval of the study protocol must also be provided in the manuscript.

## Clinical data

Policy information about [clinical studies](#)

All manuscripts should comply with the ICMJE [guidelines for publication of clinical research](#) and a completed [CONSORT checklist](#) must be included with all submissions.

|                             |                                   |
|-----------------------------|-----------------------------------|
| Clinical trial registration | <input type="text" value="none"/> |
| Study protocol              | <input type="text" value="none"/> |
| Data collection             | <input type="text" value="none"/> |
| Outcomes                    | <input type="text" value="none"/> |

## Dual use research of concern

Policy information about [dual use research of concern](#)

### Hazards

Could the accidental, deliberate or reckless misuse of agents or technologies generated in the work, or the application of information presented in the manuscript, pose a threat to:

| No                                  | Yes                      |                            |
|-------------------------------------|--------------------------|----------------------------|
| <input checked="" type="checkbox"/> | <input type="checkbox"/> | Public health              |
| <input checked="" type="checkbox"/> | <input type="checkbox"/> | National security          |
| <input checked="" type="checkbox"/> | <input type="checkbox"/> | Crops and/or livestock     |
| <input checked="" type="checkbox"/> | <input type="checkbox"/> | Ecosystems                 |
| <input checked="" type="checkbox"/> | <input type="checkbox"/> | Any other significant area |

## Experiments of concern

Does the work involve any of these experiments of concern:

- | No                                  | Yes                                                                                                  |
|-------------------------------------|------------------------------------------------------------------------------------------------------|
| <input checked="" type="checkbox"/> | <input type="checkbox"/> Demonstrate how to render a vaccine ineffective                             |
| <input checked="" type="checkbox"/> | <input type="checkbox"/> Confer resistance to therapeutically useful antibiotics or antiviral agents |
| <input checked="" type="checkbox"/> | <input type="checkbox"/> Enhance the virulence of a pathogen or render a nonpathogen virulent        |
| <input checked="" type="checkbox"/> | <input type="checkbox"/> Increase transmissibility of a pathogen                                     |
| <input checked="" type="checkbox"/> | <input type="checkbox"/> Alter the host range of a pathogen                                          |
| <input checked="" type="checkbox"/> | <input type="checkbox"/> Enable evasion of diagnostic/detection modalities                           |
| <input checked="" type="checkbox"/> | <input type="checkbox"/> Enable the weaponization of a biological agent or toxin                     |
| <input checked="" type="checkbox"/> | <input type="checkbox"/> Any other potentially harmful combination of experiments and agents         |

## ChIP-seq

### Data deposition

- Confirm that both raw and final processed data have been deposited in a public database such as [GEO](#).
- Confirm that you have deposited or provided access to graph files (e.g. BED files) for the called peaks.

|                                                                    |                |
|--------------------------------------------------------------------|----------------|
| Data access links<br><i>May remain private before publication.</i> | not applicable |
| Files in database submission                                       | not applicable |
| Genome browser session<br>(e.g. <a href="#">UCSC</a> )             | not applicable |

### Methodology

|                         |                |
|-------------------------|----------------|
| Replicates              | not applicable |
| Sequencing depth        | not applicable |
| Antibodies              | not applicable |
| Peak calling parameters | not applicable |
| Data quality            | not applicable |
| Software                | not applicable |

## Flow Cytometry

### Plots

Confirm that:

- The axis labels state the marker and fluorochrome used (e.g. CD4-FITC).
- The axis scales are clearly visible. Include numbers along axes only for bottom left plot of group (a 'group' is an analysis of identical markers).
- All plots are contour plots with outliers or pseudocolor plots.
- A numerical value for number of cells or percentage (with statistics) is provided.

### Methodology

|                           |                |
|---------------------------|----------------|
| Sample preparation        | not applicable |
| Instrument                | not applicable |
| Software                  | not applicable |
| Cell population abundance | not applicable |

Gating strategy

Tick this box to confirm that a figure exemplifying the gating strategy is provided in the Supplementary Information.

## Magnetic resonance imaging

### Experimental design

Design type

Design specifications

Behavioral performance measures

### Acquisition

Imaging type(s)

Field strength

Sequence & imaging parameters

Area of acquisition

Diffusion MRI  Used  Not used

### Preprocessing

Preprocessing software

Normalization

Normalization template

Noise and artifact removal

Volume censoring

### Statistical modeling & inference

Model type and settings

Effect(s) tested

Specify type of analysis:  Whole brain  ROI-based  Both

Statistic type for inference  
(See [Eklund et al. 2016](#))

Correction

### Models & analysis

n/a | Involved in the study

Functional and/or effective connectivity

Graph analysis

Multivariate modeling or predictive analysis

Functional and/or effective connectivity

Graph analysis

Multivariate modeling and predictive analysis
